# Supplementary material for: Psychological trauma and depression in recovered COVID-19 patients: a telecommunication based observational study
Source: PubMed Central journal article supplement (PMC10226770; doi:10.47626/2237-6089-2021-0381), 2023-05-02
Supplement: 2238-0019-trends-45-e20210381-suppl01.pdf [file 2238-0019-trends-45-e20210381-suppl01.pdf]

**Supplementary Table S1** - Socio-demographic characteristics of the recovered COVID-19 patients

| <b>Demographic variable</b>    | <b>n</b> | <b>%</b> |
|--------------------------------|----------|----------|
| Mean age: 41.90                |          |          |
| Standard deviation: 14.10      |          |          |
| Age (years)                    |          |          |
| 18-30                          | 119      | 23.7     |
| 31-40                          | 148      | 29.4     |
| 41-50                          | 84       | 16.7     |
| 51-60                          | 81       | 16.1     |
| Over 60                        | 71       | 14.1     |
| Gender                         |          |          |
| Male                           | 254      | 50.5     |
| Female                         | 249      | 49.5     |
| Area                           |          |          |
| Rural                          | 290      | 57.7     |
| Urban                          | 148      | 29.4     |
| Semi-urban                     | 65       | 12.9     |
| Marital status                 |          |          |
| Married                        | 412      | 81.9     |
| Unmarried                      | 91       | 18.1     |
| Education                      |          |          |
| Postgraduate                   | 35       | 7.0      |
| Graduate                       | 200      | 39.8     |
| Up to higher secondary         | 182      | 36.2     |
| Up to primary                  | 86       | 17.1     |
| Occupation                     |          |          |
| Business/self employed         | 134      | 26.6     |
| Government/private job         | 152      | 30.2     |
| Housewife/homemaker            | 145      | 28.8     |
| Unemployed                     | 72       | 14.3     |
| Pre-existing medical condition |          |          |
| NCD                            | 110      | 21.9     |
| No NCD                         | 362      | 72.0     |
| Pregnancy                      | 31       | 6.2      |

% = percentage; COVID-19 = coronavirus disease 2019; n = number; NCD = non-communicable diseases.

**Supplementary Table S2** - Characteristics of coronavirus disease 2019 (COVID-19) in the infected study participants

| <b>COVID-19 characteristics</b>             | <b>n</b> | <b>%</b> |
|---------------------------------------------|----------|----------|
| Type of infection                           |          |          |
| Mild                                        | 395      | 78.5     |
| Moderate                                    | 50       | 9.9      |
| Severe                                      | 58       | 11.5     |
| Presentation                                |          |          |
| Asymptomatic                                | 325      | 64.6     |
| Symptomatic                                 | 178      | 35.4     |
| Management                                  |          |          |
| Home                                        | 397      | 78.9     |
| Hospitalized + medicine                     | 67       | 13.3     |
| Hospitalized + medicine + oxygen/ventilator | 39       | 7.8      |
| Prophylactic medicine                       |          |          |
| Allopathic                                  | 287      | 57.1     |
| Ayurvedic                                   | 1        | 0.2      |
| Homoeopathic                                | 2        | 0.4      |
| Local/folk                                  | 3        | 0.6      |
| No medicine taken                           | 210      | 41.8     |

% = percentage; n = number.

**Supplementary Table S3** - Responses to severity of posttraumatic stress symptoms – Adult NSESSS in recovered COVID-19 patients

|                                                                                                                                                                                                            | Not at all |      | A little bit |      | Moderately |      | Quite a bit |      | Extremely |      |
|------------------------------------------------------------------------------------------------------------------------------------------------------------------------------------------------------------|------------|------|--------------|------|------------|------|-------------|------|-----------|------|
|                                                                                                                                                                                                            | n          | %    | n            | %    | n          | %    | n           | %    | n         | %    |
| Having “flashbacks” (for example, you re-experienced parts of a stressful experience by seeing, hearing, smelling, or physically feeling parts of the experience)?                                         | 281        | 55.9 | 145          | 28.8 | 52         | 10.3 | 16          | 3.2  | 9         | 1.8  |
| Feeling very emotionally upset when something reminded you of a stressful experience?                                                                                                                      | 210        | 41.7 | 164          | 32.6 | 79         | 15.7 | 36          | 7.2  | 14        | 2.8  |
| Trying to avoid thoughts, feelings, or physical sensations that reminded you of a stressful experience?                                                                                                    | 269        | 53.5 | 113          | 22.5 | 71         | 14.1 | 34          | 6.8  | 16        | 3.2  |
| Thinking that a stressful event happened because you or someone else (who didn’t directly harm you) did something wrong or didn’t do everything possible to prevent it, or because of something about you? | 227        | 45.1 | 155          | 30.8 | 81         | 16.1 | 24          | 4.8  | 16        | 3.2  |
| Having a very negative emotional state (for example, you were experiencing lots of fear, anger, guilt, shame, or horror) after a stressful experience?                                                     | 233        | 46.3 | 154          | 30.6 | 63         | 12.5 | 32          | 6.4  | 21        | 4.2  |
| Losing interest in activities you used to enjoy before having a stressful experience?                                                                                                                      | 334        | 66.4 | 78           | 15.5 | 47         | 9.3  | 30          | 6.0  | 14        | 2.8  |
| Being “super alert”, on guard, or constantly on the lookout for danger?                                                                                                                                    | 60         | 11.9 | 144          | 28.6 | 111        | 22.1 | 110         | 21.9 | 78        | 15.5 |
| Feeling jumpy or easily startled when you hear an unexpected noise?                                                                                                                                        | 323        | 64.2 | 24           | 4.8  | 2          | 0.4  | 0           | 0.0  | 0         | 0.0  |
| Being extremely irritable or angry to the point where you yelled at other people, got into fights, or destroyed things?                                                                                    | 439        | 87.3 | 50           | 9.9  | 12         | 2.4  | 1           | 0.2  | 0         | 0.0  |

% = percentage; COVID-19 = coronavirus disease 2019; n = number; NSESSS = National Stressful Events Survey PTSD Short Scale; PTSD = posttraumatic stress disorder.

**Supplementary Table S4** - Responses to PHQ-9 questionnaire for assessment of depression in recovered COVID-19 patients

|                                                                                                                                                                             | Not at all |      | Several days |      | More than half the days |      | Nearly every day |     |
|-----------------------------------------------------------------------------------------------------------------------------------------------------------------------------|------------|------|--------------|------|-------------------------|------|------------------|-----|
|                                                                                                                                                                             | n          | %    | n            | %    | n                       | %    | n                | %   |
| 1. Little interest or pleasure in doing things                                                                                                                              | 341        | 67.8 | 95           | 18.9 | 54                      | 10.7 | 13               | 2.6 |
| 2. Feeling down, depressed, or hopeless                                                                                                                                     | 250        | 49.7 | 152          | 30.2 | 77                      | 15.3 | 24               | 4.8 |
| 3. Trouble falling or staying asleep, or sleeping too much                                                                                                                  | 326        | 64.8 | 93           | 18.5 | 65                      | 12.9 | 19               | 3.8 |
| 4. Feeling tired or having little energy                                                                                                                                    | 248        | 49.3 | 142          | 28.2 | 71                      | 14.1 | 42               | 8.3 |
| 5. Poor appetite or overeating                                                                                                                                              | 326        | 64.8 | 110          | 21.9 | 48                      | 9.5  | 19               | 3.8 |
| 6. Feeling bad about yourself – or that you are a failure or have let yourself or your family down                                                                          | 346        | 68.8 | 94           | 18.7 | 47                      | 9.3  | 16               | 3.2 |
| 7. Trouble concentrating on things, such as reading the newspaper or watching television                                                                                    | 437        | 86.9 | 55           | 10.9 | 9                       | 1.8  | 2                | 0.4 |
| 8. Moving or speaking so slowly that other people could have noticed? Or the opposite – being so fidgety or restless that you have been moving around a lot more than usual | 477        | 94.8 | 19           | 3.8  | 6                       | 1.2  | 1                | 0.2 |
| 9. Thoughts that you would be better off dead or of hurting yourself in some way                                                                                            | 483        | 96.0 | 11           | 2.2  | 6                       | 1.2  | 3                | 0.6 |

% = percentage; COVID-19 = coronavirus disease 2019; n = number; PHQ-9 = Patient Health Questionnaire.
